# Supplementary material
Source: Springer Nature journal article supplement (https://www.springermedizin.de/resource/supplementary/13023_2006_21_MOESM1_ESM.pdf/9641470)

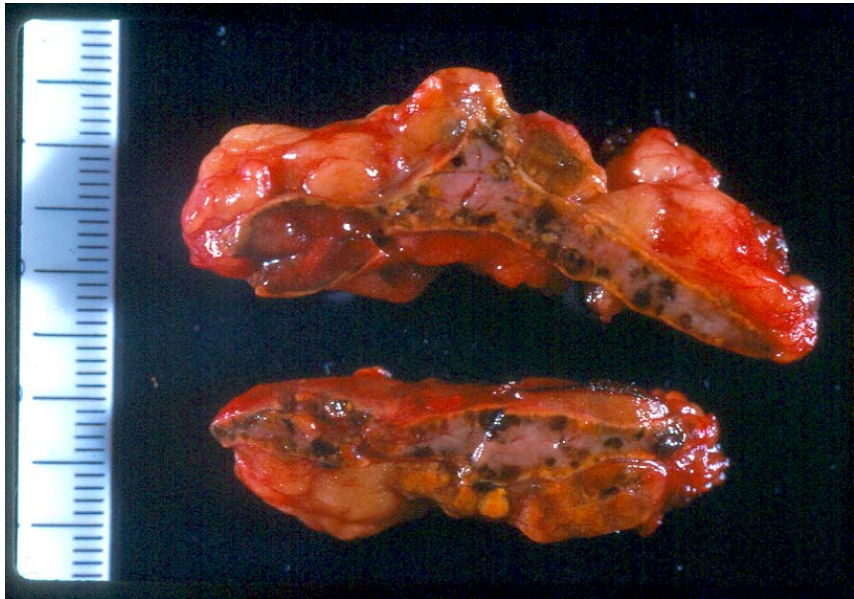

**A**

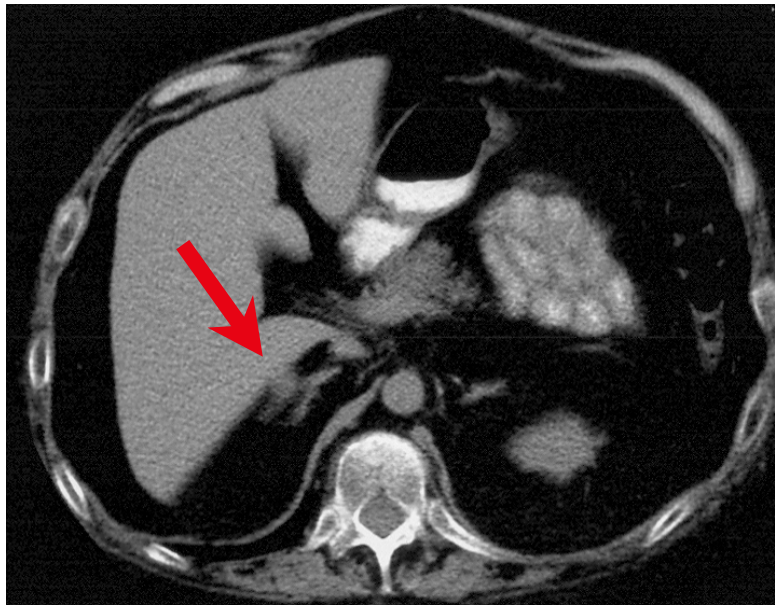

**B**

Supplement: MOESM1 [file 9641470]
